# Supplementary material for: Layered (NH4)2V6O16·1.5H2O nanobelts as a high-performance cathode for aqueous zinc-ion batteries
Source: Royal Society of Chemistry journal article supplement (doi:10.1039/c9ta05922a), 2019-01-01
Supplement: c9ta05922a1.pdf [file c9ta05922a1.pdf]

## Supporting Information

### Layered $(\text{NH}_4)_2\text{V}_6\text{O}_{16}\cdot 1.5\text{H}_2\text{O}$ Nanobelts as a High-Performance Cathode for Aqueous Zinc-Ion Batteries

Xiao Wang,<sup>a,d</sup> Baojuan Xi,<sup>a</sup> Zhenyu Feng,<sup>a</sup> Weihua Chen,<sup>b</sup> Haibo Li,<sup>c</sup> Yuxi Jia,<sup>d</sup> Jinkui Feng,<sup>d</sup> Yitai Qian,<sup>a</sup> and Shenglin Xiong<sup>\*a</sup>

<sup>a</sup> Key Laboratory of Colloid and Interface Chemistry, Ministry of Education, School of Chemistry and Chemical Engineering, and State Key Laboratory of Crystal Materials, Shandong University, Jinan 250100, P. R. China

<sup>b</sup> College of Chemistry and Molecular Engineering, Key Laboratory of Material Processing and Mold of Ministry of Education, Zhengzhou University, Zhengzhou 450001, P. R. China

<sup>c</sup> School of Chemistry and Chemical Engineering, Liaocheng University, Liaocheng, Shandong 252059, P. R. China

<sup>d</sup> Key Laboratory for Liquid-solid Structural Evolution & Processing of Materials (Ministry of Education), Shandong University, Jinan 250061, P. R. China

Correspondence and requests for materials should be addressed to S.L.X. (email: chexsl@sdu.edu.cn).

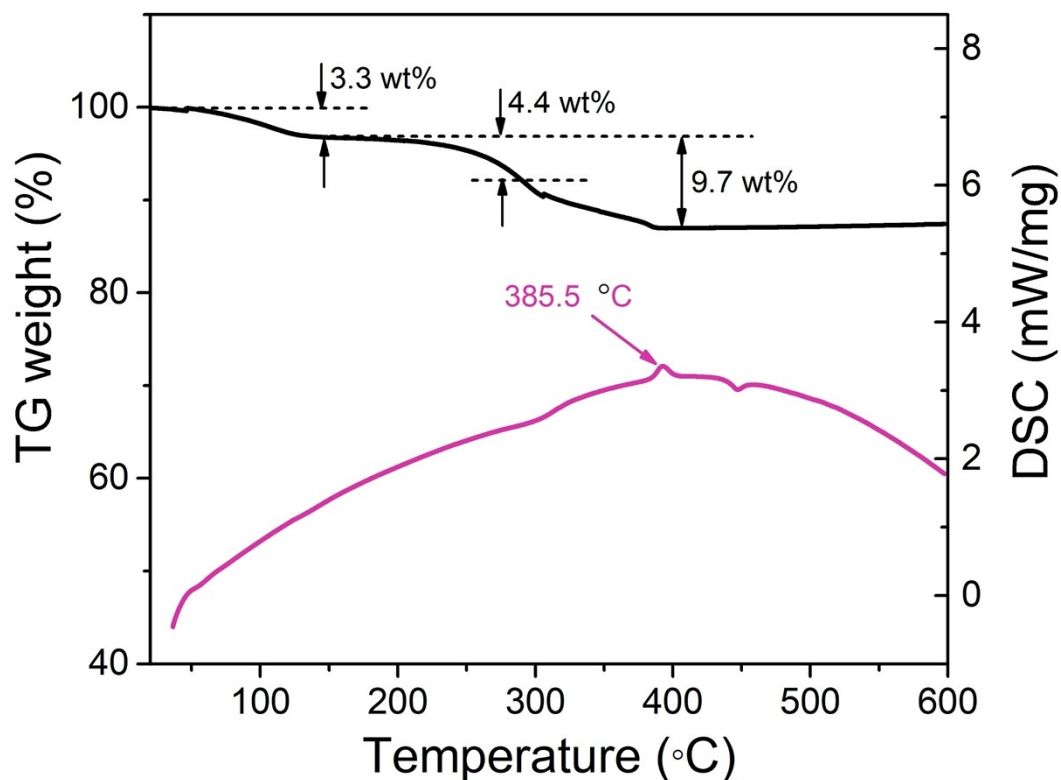

**Figure S1.** TG-DSC curves of the as-prepared H-NVO.

**Note:** As shown in Figure S1, the weight loss of about 3.3% before 150 °C belongs to the dehydration of physically absorbed water. After the temperature rises up to 280 °C, the additional weight loss of about 4.4% can be attributed to the desorption of crystal water in H-NVO. Based on this weight loss, it could be estimated that there are 1.52 crystal water in each formula unit of H-NVO, close to the theoretical value 1.57, further evidencing the phase structure of H-NVO. When the temperature continuously rises up to 385.5 °C, the phase transition temperature as shown from the DSC curve, the framework of H-NVO starts to collapse accompanied with the release of  $\text{NH}_3$  due to the decomposition of the  $\text{NH}_4^+$  and  $\text{V}_3\text{O}_8$  group. Finally, the pure  $\text{V}_2\text{O}_5$  was obtained, as evidenced in the XRD patterns shown in Figure S2.

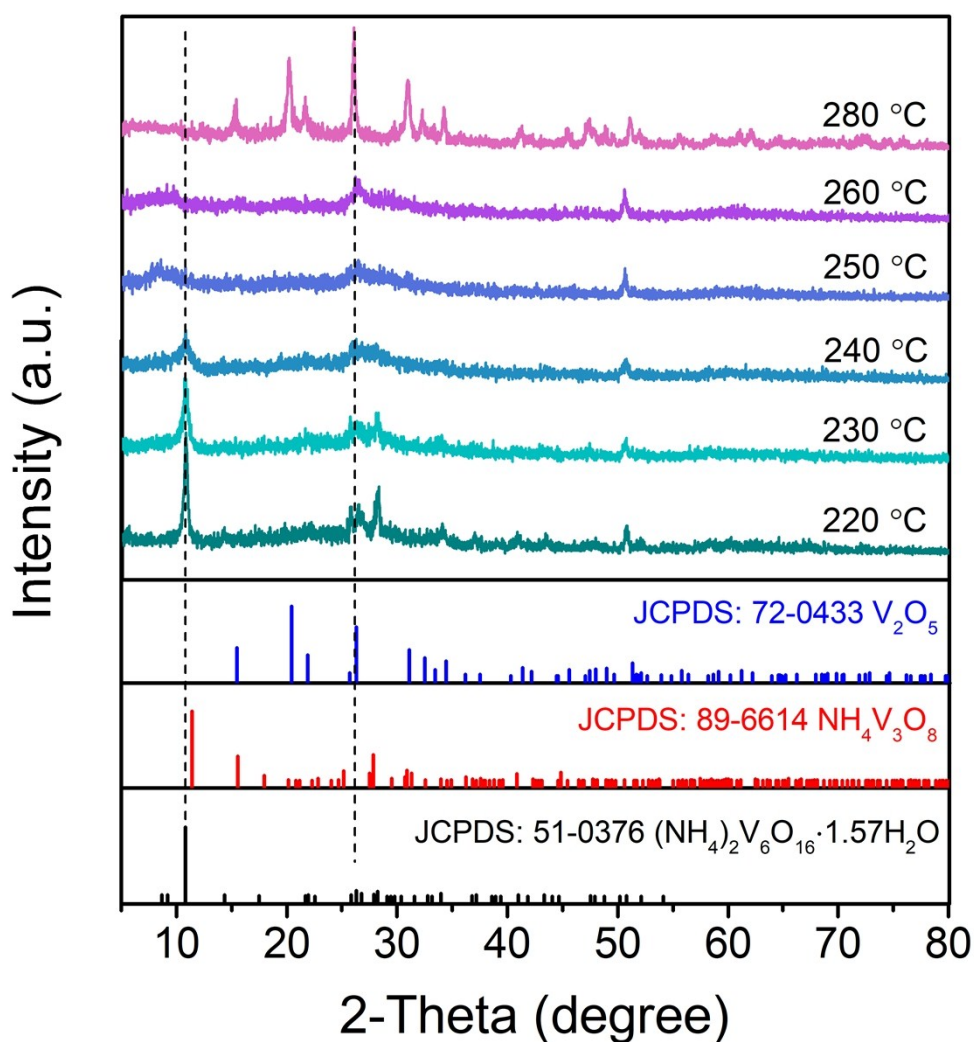

**Figure S2.** Power XRD patterns of the as-prepared H-NVO after the heat treatment at varied temperatures for 3 h in flowing argon atmosphere.

**Note:** As shown in Figure S2, the  $(\text{NH}_4)_2\text{V}_6\text{O}_{16}\cdot 1.57\text{H}_2\text{O}$  phase could be maintained when heat-treated at 220-240 °C. However, the intensities of the (002) peak located at  $10.8^\circ$  and the (112) peak located at  $28.2^\circ$  decreased with the elevated temperature, corresponding to the decrease of crystallinity. When heat-treated at 250 and 260 °C, these two characteristic peaks disappeared accompanied by the appearance of a new characteristic peak located at  $26.2^\circ$ , which could be ascribed to the (101) lattice plane of  $\text{V}_2\text{O}_5$ . Finally, when heat-treated at 280 °C, the pure  $\text{V}_2\text{O}_5$  phase was obtained.

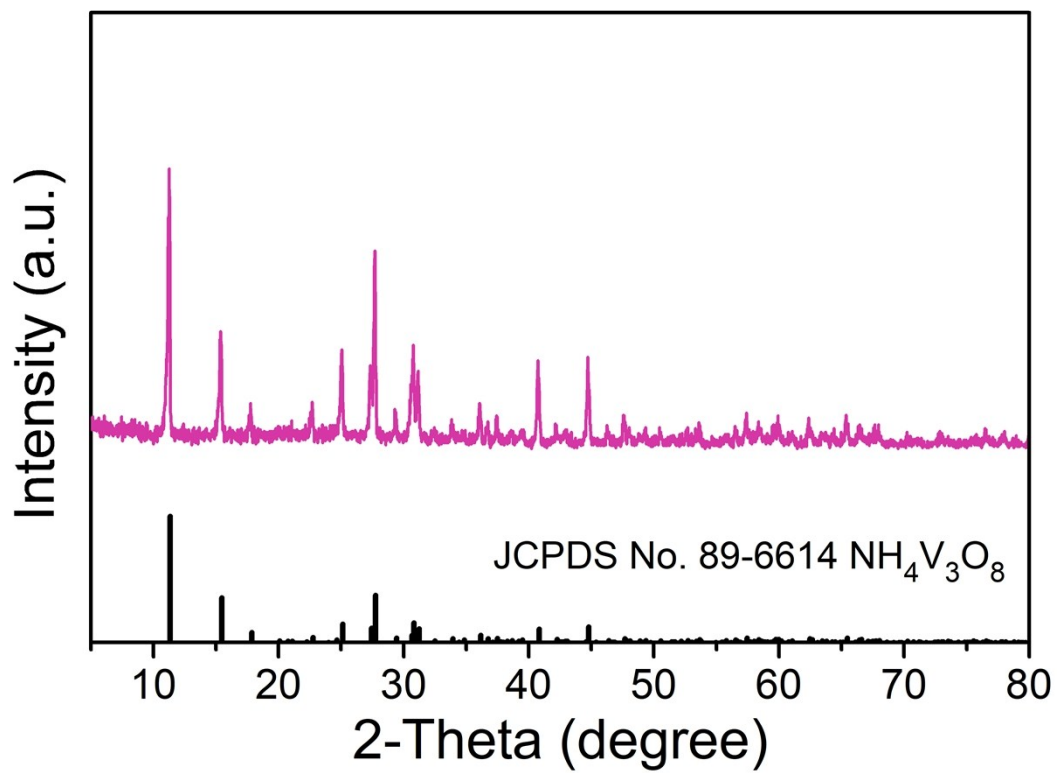

**Figure S3.** Power XRD patterns of the as-prepared NVO.

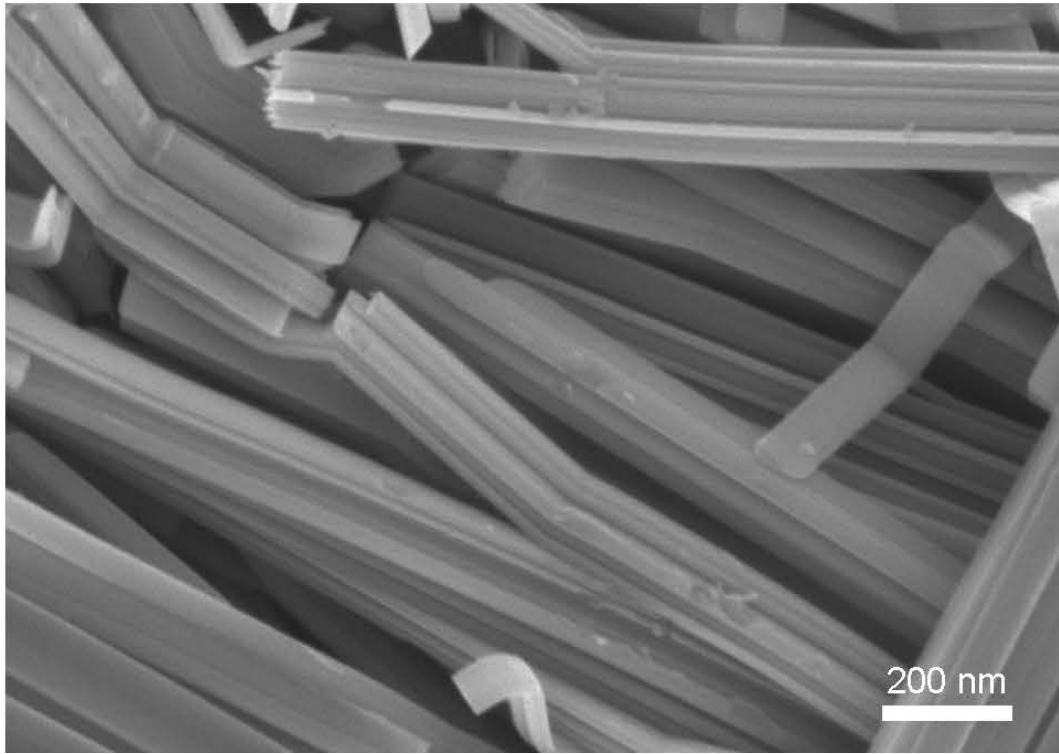

**Figure S4.** FESEM of the as-prepared H-NVO.

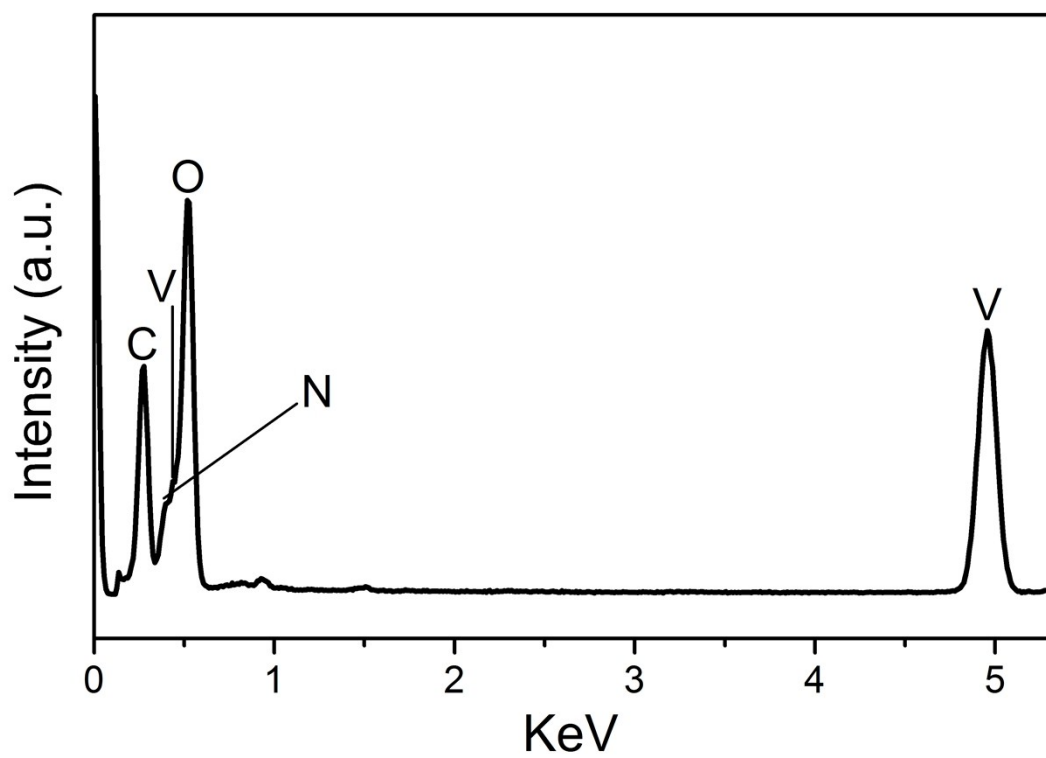

**Figure S5.** EDX spectrum of the as-fabricated H-NVO nanobelts.

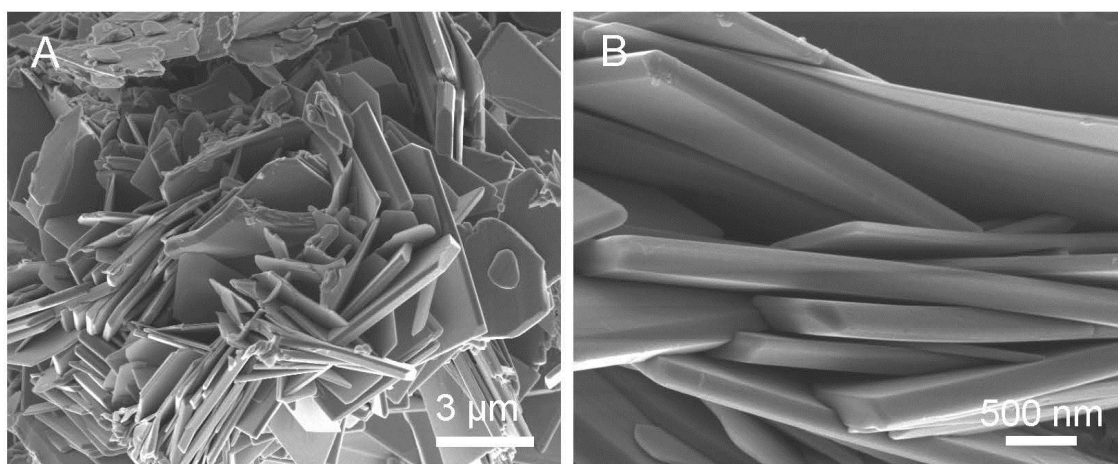

**Figure S6.** FESEM images of the as-prepared NVO. (A) low-magnification. (B) high-magnification.

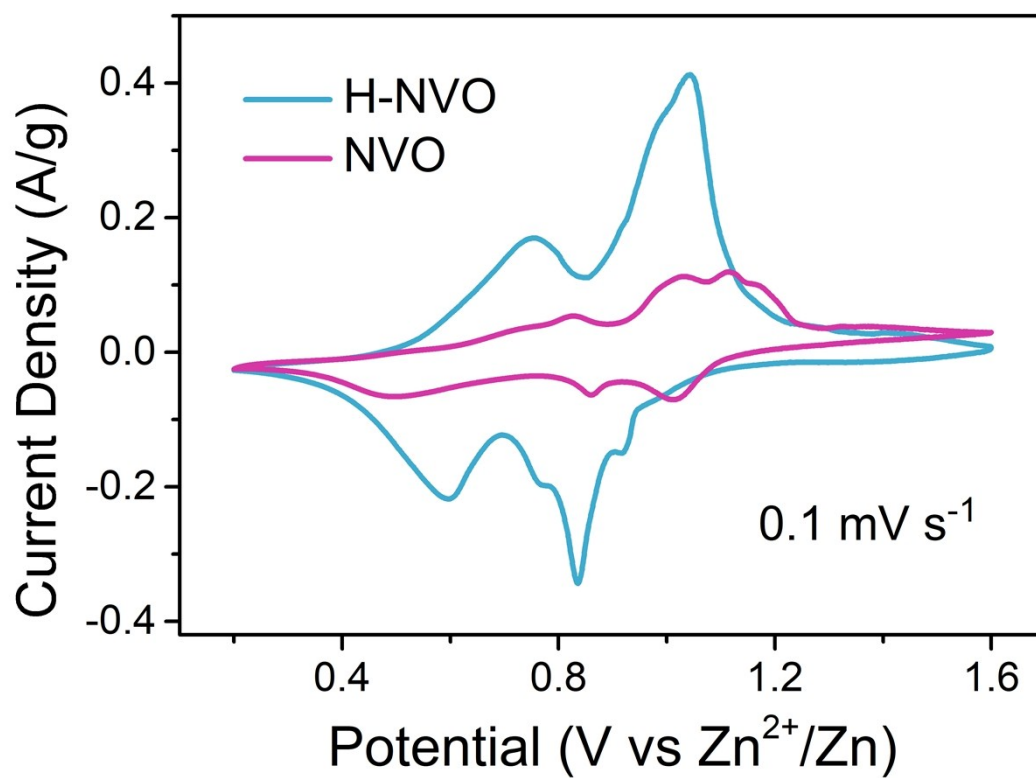

**Figure S7.** CV curves of the third cycle for H-NVO and NVO at the scan rate of 0.1 mV s<sup>-1</sup>.



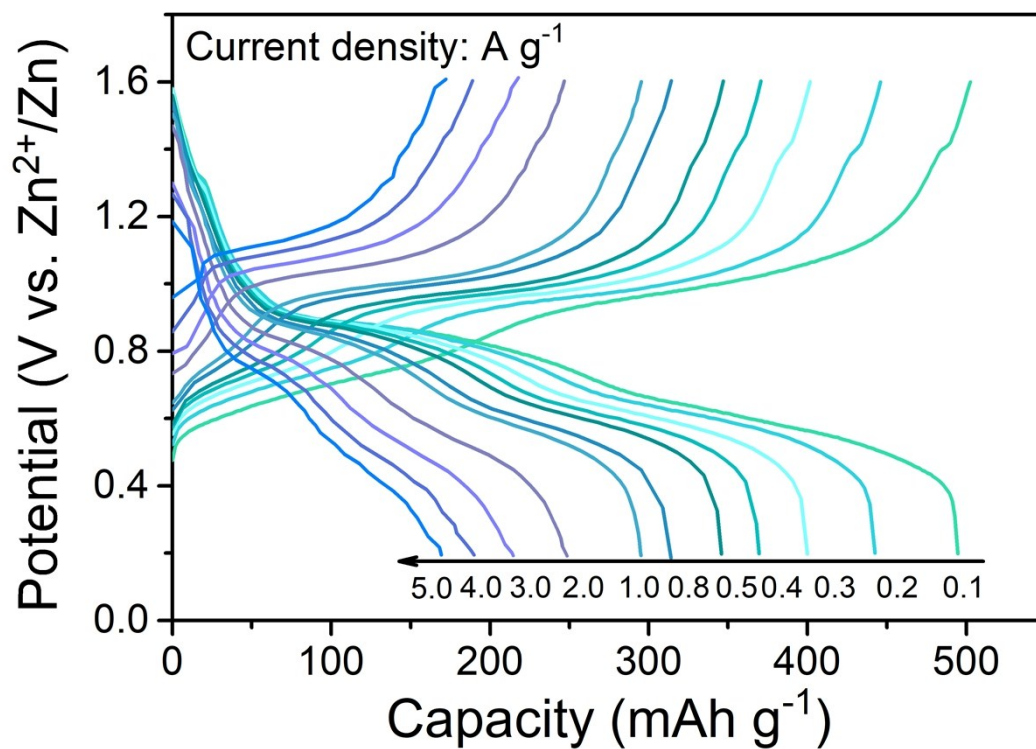

**Figure S8.** Representative galvanostatic charge/discharge curves at various current rates of the H-NVO electrode.

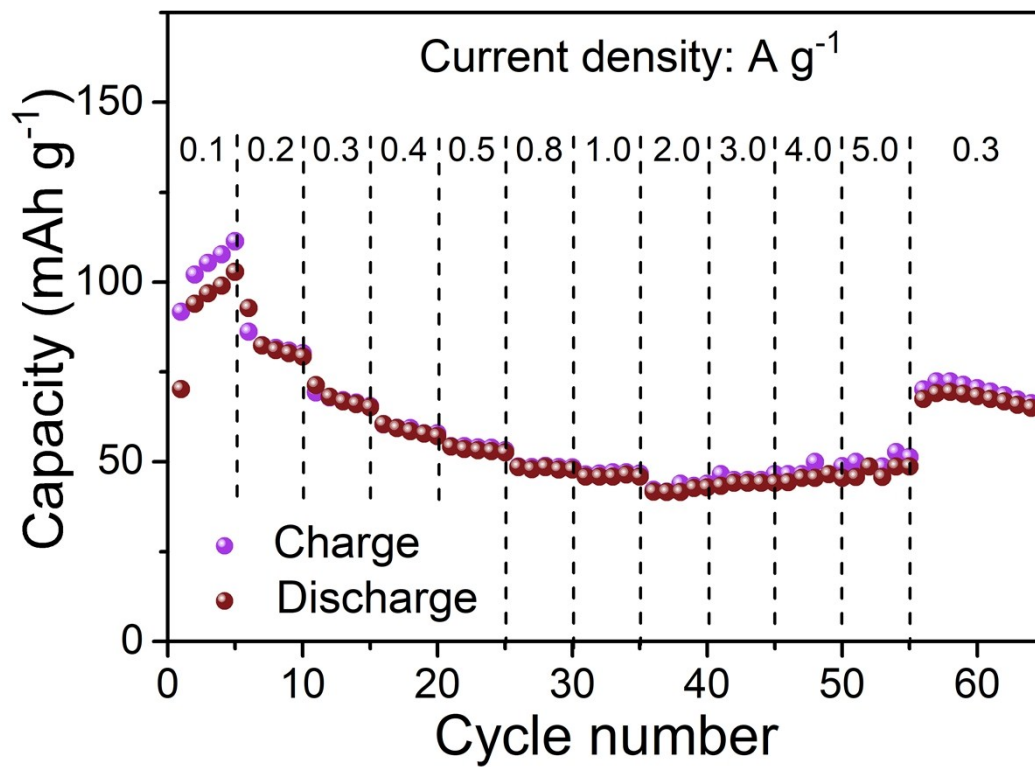

**Figure S9.** Rate capability at various current rates of the NVO electrode.

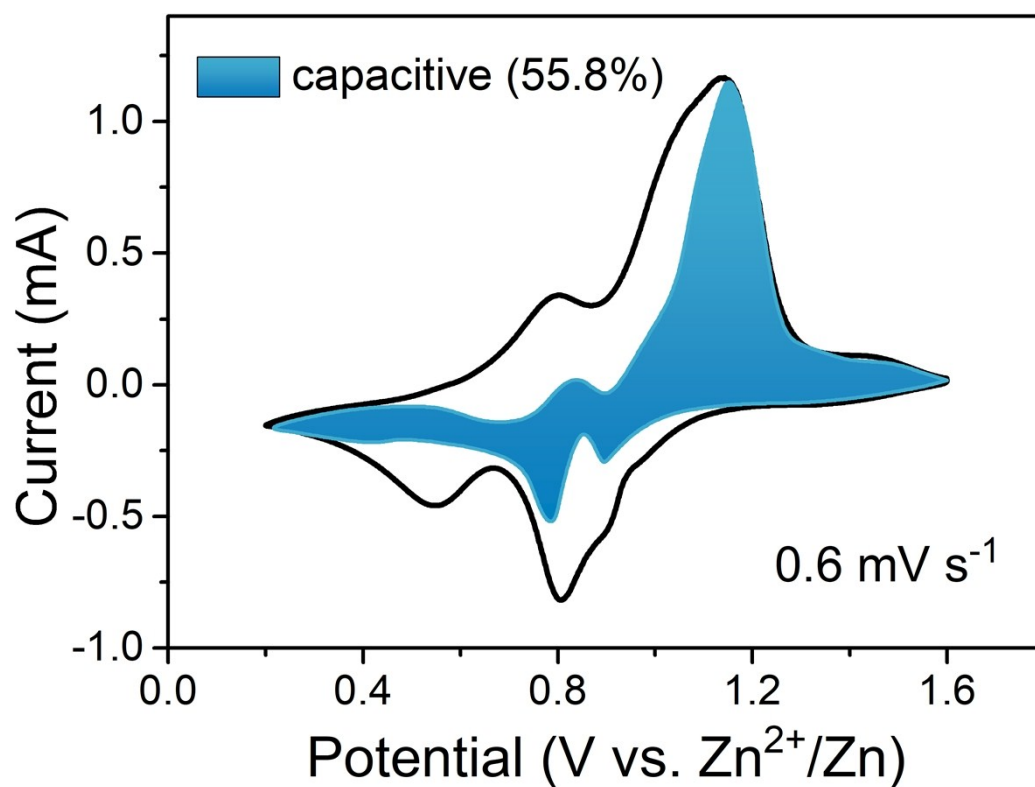

**Figure S10.** The contribution of capacitive charge storage as a function of the potential at the scan rate of  $0.6 \text{ mV s}^{-1}$  calculated based on the  $k_1$  analysis.

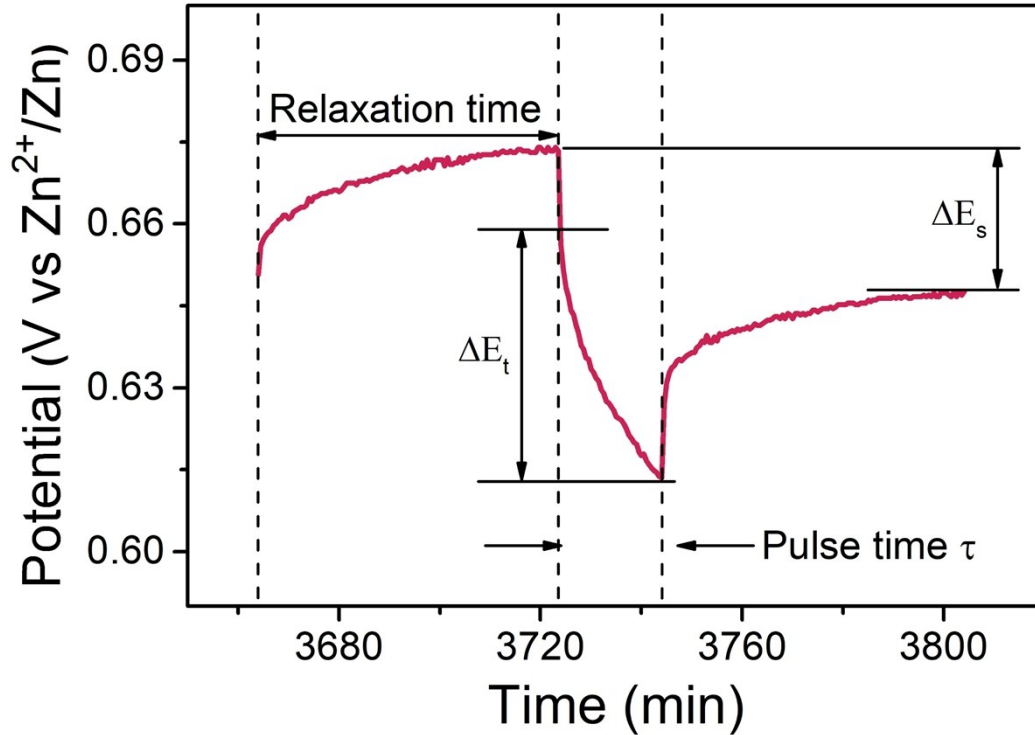

**Figure S11.** Schematic illustration of a signal step of the GITT measurement. The  $\text{Zn}^{2+}$  solid-state diffusion coefficient was obtained through the Galvanostatic Intermittent Titration Technique (GITT) measurement based on the following equation:

$$D_{\text{Zn}^{2+}}^{\text{GITT}} = \frac{4}{\pi\tau} \left( \frac{n_M V_M}{S} \right)^2 \left( \frac{\Delta E_S}{\Delta E_t} \right)^2$$

Where  $\tau$  is the constant current pulse time (s);  $n_M$  and  $V_M$  are the moles (mol) and molar volume ( $\text{cm}^3 \text{ mol}^{-1}$ ) of active material, respectively;  $S$  is the electrode/electrolyte contact area ( $\text{cm}^2$ );  $\Delta E_S$  is the change in the steady-state voltage during a single step GITT experiment;  $\Delta E_t$  is the change in a total cell voltage after the application of a constant current pulse during a single step GITT experiment. In our GITT measurement, a cell was charged or discharged at the current density of  $50 \text{ mAh g}^{-1}$  for 20 min, followed by a 1 h open circuit step to allow relaxation back to equilibrium.

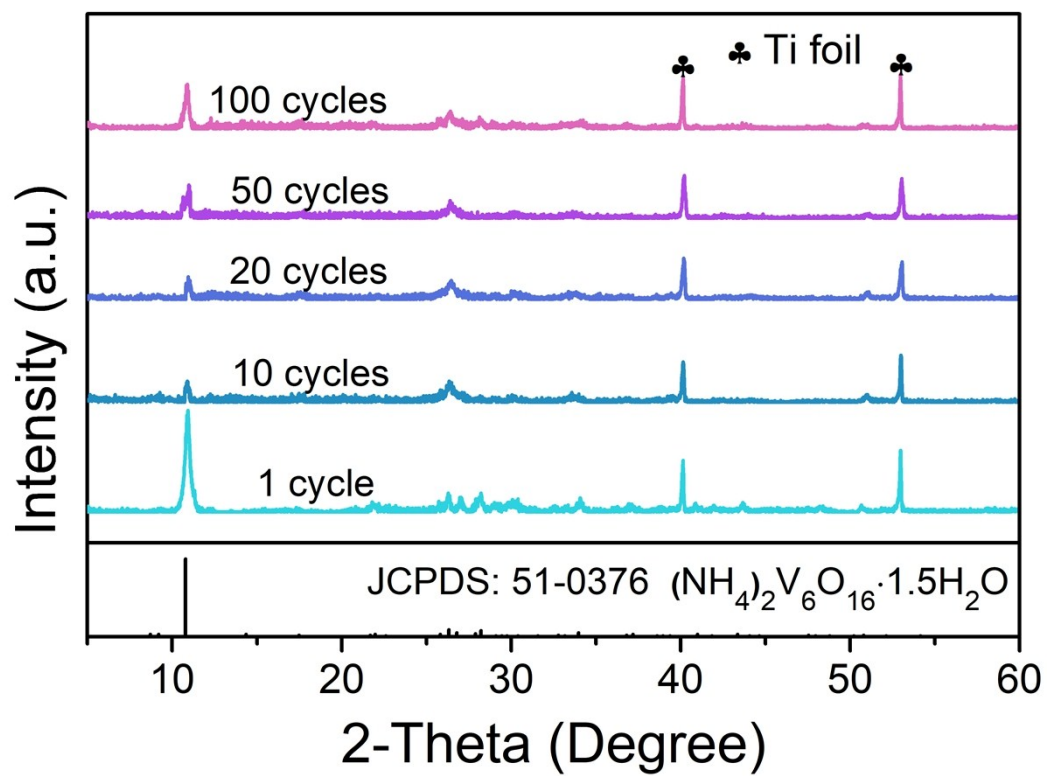

**Figure S12.** XRD patterns of the H-NVO electrode after 1<sup>st</sup>, 10<sup>th</sup>, 20<sup>th</sup>, 50<sup>th</sup>, and 100<sup>th</sup> cycles, respectively.

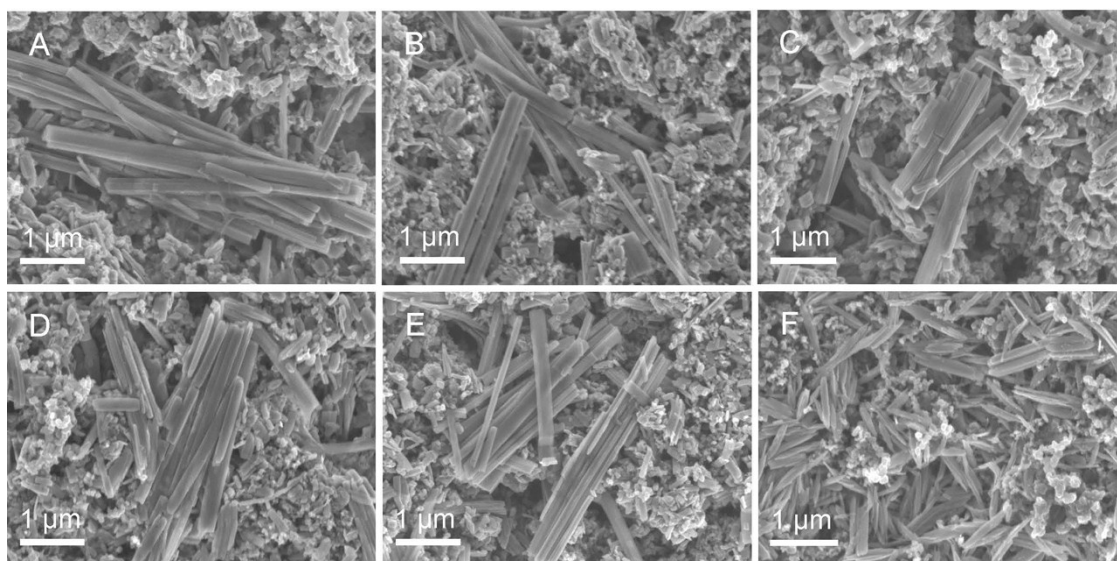

**Figure S13.** FESEM images of the H-NVO electrode after 1<sup>st</sup> (a), 10<sup>th</sup> (b), 20<sup>th</sup> (c), 50<sup>th</sup> (d), 100<sup>th</sup> (e) and 3000<sup>th</sup> (f) cycles, respectively.

**Table S1.** Comparison of the electrochemical performances over previous reported cathode materials in aqueous zinc ion batteries.

| Cathode materials                                                              | Electrochemical performance                                        | Reference |
|--------------------------------------------------------------------------------|--------------------------------------------------------------------|-----------|
| $(\text{NH}_4)_2\text{V}_6\text{O}_{16} \cdot 1.5\text{H}_2\text{O}$           | 152 mAh g <sup>-1</sup> at 5 A g <sup>-1</sup> (3000 cycles)       | This work |
| $\text{Na}_{0.33}\text{V}_2\text{O}_5$                                         | 218.4 mAh g <sup>-1</sup> at 1 A g <sup>-1</sup> (1000 cycles)     | [1]       |
| $\text{Mg}_{0.34}\text{V}_2\text{O}_5 \cdot 0.84\text{H}_2\text{O}$            | ca. 88 mAh g <sup>-1</sup> at 5 A g <sup>-1</sup> (2000 cycles)    | [2]       |
| $\text{Zn}_3\text{V}_2\text{O}_7(\text{OH})_2 \cdot 2\text{H}_2\text{O}$       | 101 mAh g <sup>-1</sup> at 0.2 A g <sup>-1</sup> (300 cycles)      | [3]       |
| $\text{H}_2\text{V}_3\text{O}_8$                                               | 136.1 mAh g <sup>-1</sup> at 5 A g <sup>-1</sup> (1000 cycles)     | [4]       |
| $\text{NaV}_3\text{O}_8 \cdot 1.5\text{H}_2\text{O}$                           | ca. 130 mAh g <sup>-1</sup> at 4 A g <sup>-1</sup> (1000 cycles)   | [5]       |
| $\text{LiV}_3\text{O}_8$                                                       | 172 mAh g <sup>-1</sup> at 0.133 A g <sup>-1</sup> (65 cycles)     | [6]       |
| $\text{Na}_{1.1}\text{V}_3\text{O}_{7.9}@\text{rGO}$                           | 171 mAh g <sup>-1</sup> at 0.3 A g <sup>-1</sup> (100 cycles)      | [7]       |
| $\text{K}_2\text{V}_8\text{O}_{21}$                                            | ca. 125 mAh g <sup>-1</sup> at 6 A g <sup>-1</sup> (300 cycles)    | [8]       |
| $\alpha\text{-Zn}_2\text{V}_2\text{O}_7$                                       | 138 mAh g <sup>-1</sup> at 4 A g <sup>-1</sup> (1000 cycles)       | [9]       |
| $\text{Fe}_5\text{V}_{15}\text{O}_{39}(\text{OH})_9 \cdot 9\text{H}_2\text{O}$ | ca. 100 mAh g <sup>-1</sup> at 5 A g <sup>-1</sup> (300 cycles)    | [10]      |
| $\text{Na}_3\text{V}_2(\text{PO}_4)_3$                                         | 72 mAh g <sup>-1</sup> at 0.05 A g <sup>-1</sup> (100 cycles)      | [11]      |
| $\text{VO}_2$                                                                  | ca. 75 mAh g <sup>-1</sup> at 3 A g <sup>-1</sup> (5000 cycles)    | [12]      |
| $\alpha\text{-MnO}_2$                                                          | ca. 92 mAh g <sup>-1</sup> at 1.54 A g <sup>-1</sup> (5000 cycles) | [13]      |
| $\beta\text{-MnO}_2$                                                           | 135 mAh g <sup>-1</sup> at 2 A g <sup>-1</sup> (2000 cycles)       | [14]      |
| $\text{ZnMn}_2\text{O}_4$                                                      | ca. 80 mAh g <sup>-1</sup> at 0.5 A g <sup>-1</sup> (500 cycles)   | [15]      |
| $\text{K}_{0.8}\text{Mn}_8\text{O}_{16}$                                       | ca. 150 mAh g <sup>-1</sup> at 1 A g <sup>-1</sup> (1000 cycles)   | [16]      |
| $\alpha\text{-Mn}_2\text{O}_3$                                                 | 82.2 mAh g <sup>-1</sup> at 2 A g <sup>-1</sup> (1000 cycles)      | [17]      |
| $\text{Mn}_3\text{O}_4$                                                        | 106.1 mAh g <sup>-1</sup> at 0.5 A g <sup>-1</sup> (300 cycles)    | [18]      |
| $\text{MnO}_x@\text{N-C}$                                                      | 100 mAh g <sup>-1</sup> at 2 A g <sup>-1</sup> (1600 cycles)       | [19]      |
| $\text{VS}_2$                                                                  | 110.9 mAh g <sup>-1</sup> at 0.5 A g <sup>-1</sup> (200 cycles)    | [20]      |
| $\text{MoS}_2$                                                                 | 88.6 mAh g <sup>-1</sup> at 1 A g <sup>-1</sup> (1000 cycles)      | [21]      |
| $\text{Zn}_3[\text{Fe}(\text{CN})_6]_2$                                        | ca. 80 mAh g <sup>-1</sup> at 0.3 A g <sup>-1</sup> (100 cycles)   | [22]      |
| $\text{ZnHCF}@\text{MnO}_2$                                                    | 80 mAh g <sup>-1</sup> at 0.5 A g <sup>-1</sup> (1000 cycles)      | [23]      |

## References

1. P. He, G. B. Zhang, X. B. Liao, M. Y. Yan, X. Xu, Q. Y. An, J. Liu and L. Q. Mai, *Adv. Energy Mater.*, 2018, **8**, 1702463.
2. F. W. Ming, H. F. Liang, Y. J. Lei, S. Kandambeth, M. Eddaoudi and H. N. Alshareef, *ACS Energy Lett.*, 2018, **3**, 2602-2609.
3. C. Xia, J. Guo, Y. J. Lei, H. F. Liang, C. Zhao and H. N. Alshareef, *Adv. Mater.*, 2018, **30**, 1705580.
4. P. He, Y. L. Quan, X. Xu, M. Y. Yan, W. Yang, Q. Y. An, L. He and L. Q. Mai, *Small*, 2017, **13**, 1702551.
5. F. Wan, L. L. Zhang, X. Dai, X. Y. Wang, Z. Q. Niu and J. Chen, *Nat. Commun.*, 2018, **9**, 1656.
6. M. H. Alfaruqi, V. Mathew, J. J. Song, S. J. Kim, S. Islam, D. T. Pham, J. Jo, S. Kim, J. P. Baboo, Z. L. Xiu, K. S. Lee, Y. K. Sun and J. Kim, *Chem. Mater.*, 2017, **29**, 1684-1694.
7. Y. S. Cai, F. Liu, Z. G. Luo, G. Z. Fang, J. Zhou, A. Q. Pan and S. Q. Liang, *Energy Storage Mater.* 2018, **13**, 168-174.
8. B. Y. Tang, G. Z. Fang, J. Zhou, L. B. Wang, Y. P. Lei, C. Wang, T. Q. Lin, Y. Tang and S. Q. Liang, *Nano Energy*, 2018, **51**, 579-587.
9. B. Sambandam, V. Soundharrajan, S. Kim, M.H. Alfaruqi, J. Jo, S. Kim, V. Mathew, Y.-k. Sun and J. Kim, *J. Mater. Chem. A*, 2018, **6**, 3850-3856.
10. Z. Peng, Q. L. Wei, S. S. Tan, P. He, W. Luo, Q. Y. An, L. Q. Mai, *Chem. Commun.*, 2018, **54**, 4041-4044.
11. G. L. Li, Z. Yang, Y. Jiang, C. H. Jin, W. Huang, X. L. Ding and Y. H. Huang,



- Nano Energy*, 2016, **25**, 211-217.
12. L. N. Chen, Y. S. Ruan, G. B. Zhang, Q. L. Wei, Y. L. Jiang, T. F. Xiong, P. He, W. Yang, M. Y. Yan, Q. Y. An and L. Q. Mai, *Chem. Mater.*, 2019, **31**, 699-706.
13. H. L. Pan, Y. Y. Shao, P. F. Yan, Y. W. Cheng, K. S. Han, Z. M. Nie, C. M. Wang, J. H. Yang, X. L. Li, P. Bhattacharya, K. T. Mueller and J. Liu, *Nat. Energy*, 2016, **1**, 16039.
14. N. Zhang, F. Y. Cheng, J. X. Liu, L. B. Wang, X. H. Long, X. S. Liu, F. J. Li and J. Chen, *Nat. Commun.*, 2017, **8**, 405.
15. N. Zhang, F. Y. Cheng, Y. C. Liu, Q. Zhao, K. X. Lei, C. C. Chen, X. S. Liu and J. Chen, *J. Am. Chem. Soc.*, 2016, **138**, 12894-12901.
16. G. Z. Fang, C. Y. Zhu, M. H. Chen, J. Zhou, B. Y. Tang, X. X. Cao, X. S. Zheng, A. Q. Pan and S. Q. Liang, *Adv. Funct. Mater.*, 2019, **29**, 1808375.
17. B. Z. Jiang, C. J. Xu, C. L. Wu, L. B. Dong, J. Li and F. Y. Kang, *Electrochim. Acta*, 2017, **229**, 422-428.
18. J. W. Hao, J. Mou, J. W. Zhang, L. B. Dong, W. H. Liu, C. J. Xu, F. Y. Kang, *Electrochim. Acta*, 2018, **259**, 170-178.
19. Y. Q. Fu, Q. L. Wei, G. X. Zhang, X. M. Wang, J. H. Zhang, Y. F. Hu, D. N. Wang, L. Zuin, T. Zhou, Y. C. Wu and S. H. Sun, *Adv. Energy Mater.*, 2018, 1801445.
20. P. He, M. Y. Yan, G. B. Zhang, R. M. Sun, L. N. Chen, Q. Y. An and L. Q. Mai, *Adv. Energy Mater.*, 2017, **7**, 1601920.
21. W. W. Xu, C. L. Sun, K. N. Zhao, X. Cheng, S. Rawal, Y. Xu and Y. Wang, *Energy Storage Mater.* 2019, **16**, 527-534.

22.L. Y. Zhang, L. Chen, X. F. Zhou and Z. P. Liu, *Adv. Energy Mater.*, 2015, 5, 1400930.

23.K. Lu, B. Song, Y. X. Zhang, H. Y. Ma and J. T. Zhang, *J. Mater. Chem. A*, 2017, 5, 23628-23633.
